# Supplementary material for: Clinicopathological significance and impact on the outcomes of IGF-1R and Livin in patients with colorectal cancer
Source: Research Square preprint supplement (doi:10.21203/rs.3.rs-1515648/v1), 2022-04-15
Supplement: Supplementary file 1 [file 82e265786cd96e5a4394c54f.xlsx]

## Sheet: Sheet1
	Table 2. The clinicopathologic significance of IGF-1R and Livin expression in patients with CRC.
	Characteristics	Number	IGF-1R expression				P-value	Livin expression				P-value
			-	+	++	+++		-	+	++	+++
	Age,years						0.824					0.76
	<50	8	1	2	4	1		4	2	2	0
	50-70	37	6	10	8	13		11	15	8	3
	≥71	15	2	5	6	2		8	4	3	0
	Gender						0.847					0.889
	Male	33	6	7	11	9		13	11	7	2
	Female	27	3	10	7	7		10	10	6	1
	Tumor diameter, cm						0.852					0.831
	<5	40	6	11	12	11		17	12	8	3
	≥5	20	3	6	6	5		6	9	5	0
	Tumor location						0.059					0.918
	Right colon	16	2	5	6	3		4	9	2	1
	Lift colon	18	1	6	7	4		5	7	6	0
	Rectum	26	6	6	5	9		14	5	5	2
	Pathological type						0.363					0.847
	Adenocarcinoma	56	8	15	18	15		22	19	12	3
	Mucinous adenocarcinoma	4	1	2	0	1		1	2	1	0
	Histological type						0.598					0.328
	Moderately-Well differentiated	54	8	15	16	15		20	18	13	3
	Poorly differentiated	6	1	2	2	1		3	3	0	0
	Depth of invasion						0.004					0.291
	Tis-T1	8	2	5	1	0		4	3	1	0
	T2-T4	52	7	12	17	16		19	18	12	3
	Dukes' stage						0					0.044
	A	15	6	6	2	1		9	5	1	0
	B	15	2	7	5	1		5	7	3	0
	C	15	1	3	6	5		6	4	5	0
	D	15	0	1	5	9		3	5	4	3
	Lymph node metastasis						0					0.022
	Absent	33	8	13	8	4		16	12	4	1
	Present	27	1	4	10	12		7	9	9	2
	Distant metastasis						0					0.032
	Absent	45	9	16	13	7		20	16	9	0
	Present	15	0	1	5	9		3	5	4	3
